# Supplementary material
Source: PubMed Central journal article supplement (PMC3319436)
Supplement: NIHMS361853-supplement-supplement_1.pdf [file NIHMS361853-supplement-supplement_1.pdf]

**Midlife blood pressure, plasma  $\beta$  amyloid and the risk for Alzheimer's disease:  
the Honolulu Asia Aging Study**

Nilay S. Shah, BS; Jean-Sébastien Vidal, MD, PhD; Kamal Masaki, MD; Helen Petrovitch, MD; G. Webster Ross, MD; Cathy Tilley, BSMT; Ronald B. DeMattos, PhD; Russell P. Tracy, PhD; Lon R. White, MD, MPH; Lenore J. Launer, PhD.

**ONLINE SUPPLEMENT**

**Table S1. Plasma A $\beta$  sub-study sample compared to the rest of the HAAS exam 4 participants not included in A $\beta$  sub-study**

| Characteristics*                 | HAAS subjects |               | p <sup>†</sup>      |
|----------------------------------|---------------|---------------|---------------------|
|                                  | Sub-sample    | Rest          |                     |
|                                  | N=667         | N=3067        |                     |
| Age at exam 4, years             | 77.3 (4.5)    | 77.9 (4.7)    | <0.001              |
| Education, years                 | 10.6 (3.2)    | 10.4 (3.2)    | 0.34                |
| BMI at exam 4, kg/m <sup>2</sup> | 23.7 (2.9)    | 23.4 (3.2)    | 0.14                |
| Blood pressure, mm Hg            |               |               |                     |
| SBP                              | 132.7 (16.7)  | 131.7 (17.1)  | 0.10                |
| DBP                              | 83.1 (9.5)    | 82.5 (9.8)    | 0.23                |
| Pulse pressure                   | 49.6 (11.0)   | 49.2 (11.2)   | 0.13                |
| BP Trt use, exam 4, n (%)        | 285 (42.7)    | 1297 (42.3)   | 0.91                |
| Lipid at exam 1, mg/dL           |               |               |                     |
| Triglycerides                    | 295.3 (269.4) | 218.0 (152.2) | <0.001 <sup>‡</sup> |
| Cholesterol                      | 236.3 (44.5)  | 214.3 (31.9)  | <0.001              |

\*: Mean (SD) unless otherwise indicated; <sup>†</sup>: adjusted for age at exam 3; <sup>‡</sup>: triglycerides are log-transformed for computation of the comparison. BMI = body mass index, SBP = systolic blood pressure, DBP = diastolic blood pressure, Trt = treatment.

**Table S2. Subject characteristics by plasma A $\beta$ 1-40 quartile: HAAS A $\beta$  sub-study**

| Characteristics*               | A $\beta$ 1-40 quartiles (from low to high) |               |               |               | p <sup>†</sup>    |
|--------------------------------|---------------------------------------------|---------------|---------------|---------------|-------------------|
|                                | Q1 (n=166)                                  | Q2 (n=167)    | Q3 (n=167)    | Q4 (n=167)    |                   |
| Age at exam 3, years           | 58.0 (4.1)                                  | 58.8 (4.3)    | 58.9 (4.5)    | 59.9 (4.6)    | 0.0002            |
| Age at event, years            | 82.1 (4.3)                                  | 83.2 (4.4)    | 83.2 (4.5)    | 83.5 (4.5)    | 0.93              |
| A $\beta$ draw to event, years | 15.8 (3.2)                                  | 16.0 (3.0)    | 15.9 (3.1)    | 15.4 (3.2)    | 0.82              |
| Education, years               | 10.8 (3.1)                                  | 10.5 (3.2)    | 10.7 (3.2)    | 10.6 (3.2)    | 0.74              |
| Stroke, n (%)                  | 8 (4.8)                                     | 9 (5.4)       | 11 (6.6)      | 17 (10.2)     | 0.04              |
| Diabetes, n (%)                | 64 (38.6)                                   | 72 (43.1)     | 64 (38.3)     | 73 (43.7)     | 0.54              |
| ApoE genotype, n (%)           |                                             |               |               |               |                   |
| 22 or 23                       | 12 (7.2)                                    | 17 (10.2)     | 15 (9.0)      | 9 (5.4)       |                   |
| 33                             | 112 (67.5)                                  | 110 (65.9)    | 113 (67.7)    | 120 (71.9)    | 0.53              |
| 34 or 44                       | 32 (19.3)                                   | 31 (18.6)     | 30 (18.0)     | 32 (19.2)     |                   |
| Missing value                  | 10 (6.0)                                    | 9 (5.4)       | 9 (5.4)       | 6 (3.6)       |                   |
| $\beta$ Amyloid <sup>‡</sup>   |                                             |               |               |               |                   |
| A $\beta$ 1-40                 | 4.93 (0.09)                                 | 5.10 (0.03)   | 5.20 (0.03)   | 5.41 (0.25)   | <.0001            |
| A $\beta$ 1-42                 | 2.96 (0.35)                                 | 3.03 (0.44)   | 3.14 (0.36)   | 3.42 (0.63)   | <.0001            |
| A $\beta$ 1-40/1-42 ratio      | 1.69 (0.23)                                 | 1.73 (0.32)   | 1.68 (0.19)   | 1.62 (0.23)   | 0.002             |
| Dementia, n (%)                |                                             |               |               |               |                   |
| Total                          | 20 (12.1)                                   | 19 (11.4)     | 18 (10.8)     | 20 (12.0)     | 0.32              |
| All AD                         | 16 (9.6)                                    | 14 (8.4)      | 11 (6.6)      | 12 (7.2)      | 0.08              |
| Pure AD                        | 14 (8.4)                                    | 12 (7.2)      | 6 (3.6)       | 6 (3.6)       | 0.01              |
| VaD                            | 4 (2.4)                                     | 5 (3.0)       | 7 (4.2)       | 8 (4.8)       | 0.40              |
| Blood pressure, mmHg           |                                             |               |               |               |                   |
| SBP                            | 131.0 (15.6)                                | 131.4 (15.9)  | 132.0 (17.4)  | 136.2 (17.4)  | 0.02              |
| DBP                            | 82.1 (9.0)                                  | 82.9 (9.3)    | 83.1 (10.3)   | 84.2 (9.2)    | 0.05              |
| Pulse pressure                 | 48.9 (10.0)                                 | 48.6 (10.3)   | 49.0 (10.7)   | 52.1 (12.4)   | 0.08              |
| Lipid at exam 1, mg/dL         |                                             |               |               |               |                   |
| Triglycerides                  | 260.2 (214.5)                               | 302.6 (266.2) | 300.2 (250.9) | 317.7 (330.6) | 0.04 <sup>§</sup> |
| Cholesterol                    | 228.7 (41.6)                                | 239.8 (43.1)  | 235.0 (47.1)  | 241.4 (45.1)  | 0.03              |

\*: Mean (SD) unless otherwise indicated; <sup>†</sup>: p for linear trend, adjusted for age at exam 3; <sup>‡</sup>: log-transformed; <sup>§</sup>: triglycerides are log-transformed for computation of linear trend. SBP = systolic blood pressure, DBP = diastolic blood pressure; event includes death, dementia or end of follow-up.

**Table S3. Subject characteristics by plasma A $\beta$ 1-42 quartile: HAAS A $\beta$  sub-study**

| Characteristics*               | A $\beta$ 1-42 quartiles (from low to high) |               |               |               | p <sup>†</sup>    |
|--------------------------------|---------------------------------------------|---------------|---------------|---------------|-------------------|
|                                | Q1 (n=166)                                  | Q2 (n=167)    | Q3 (n=167)    | Q4 (n=167)    |                   |
| Age at exam 3, years           | 58.5 (4.1)                                  | 58.8 (4.7)    | 59.3 (4.8)    | 59.0 (4.1)    | 0.18              |
| Age at event, years            | 82.4 (4.2)                                  | 83.0 (4.7)    | 83.4 (4.8)    | 83.0 (4.0)    | 0.59              |
| A $\beta$ draw to event, years | 15.8 (3.1)                                  | 15.9 (3.1)    | 15.7 (3.2)    | 15.7 (3.0)    | 1.00              |
| Education, years               | 10.2 (3.1)                                  | 11.0 (3.0)    | 10.7 (3.4)    | 10.6 (3.1)    | 0.29              |
| Stroke, n (%)                  | 8 (4.8)                                     | 9 (5.4)       | 12 (7.2)      | 16 (9.6)      | 0.06              |
| Diabetes, n (%)                | 57 (34.3)                                   | 78 (46.7)     | 66 (39.5)     | 72 (43.1)     | 0.26              |
| ApoE genotype, n (%)           |                                             |               |               |               |                   |
| 22 or 23                       | 11 (6.6)                                    | 11 (6.6)      | 19 (11.4)     | 12 (7.2)      |                   |
| 33                             | 109 (65.7)                                  | 113 (67.7)    | 116 (69.5)    | 117 (70.1)    | 0.28              |
| 34 or 44                       | 39 (23.5)                                   | 33 (19.8)     | 25 (15.0)     | 28 (16.8)     |                   |
| Missing value                  | 7 (4.2)                                     | 10 (6.0)      | 7 (4.2)       | 10 (6.0)      |                   |
| $\beta$ Amyloid <sup>‡</sup>   |                                             |               |               |               |                   |
| A $\beta$ 1-40                 | 5.07 (0.15)                                 | 5.14 (0.17)   | 5.15 (0.15)   | 5.29 (0.31)   | <.0001            |
| A $\beta$ 1-42                 | 2.61 (0.26)                                 | 3.00 (0.07)   | 3.23 (0.07)   | 3.71 (0.52)   | <.0001            |
| A $\beta$ 1-40/1-42 ratio      | 1.97 (0.28)                                 | 1.71 (0.07)   | 1.59 (0.05)   | 1.44 (0.13)   | <.0001            |
| Dementia, n (%)                |                                             |               |               |               |                   |
| Total                          | 17 (10.2)                                   | 23 (13.8)     | 22 (13.2)     | 15 (9.0)      | 0.48              |
| All AD                         | 13 (7.8)                                    | 17 (10.2)     | 16 (9.6)      | 7 (4.2)       | 0.14              |
| Pure AD                        | 10 (6.0)                                    | 13 (7.8)      | 12 (7.2)      | 3 (1.8)       | 0.07              |
| VaD                            | 4 (2.4)                                     | 6 (3.6)       | 6 (3.6)       | 8 (4.8)       | 0.36              |
| Blood pressure, mmHg           |                                             |               |               |               |                   |
| SBP                            | 129.4 (15.5)                                | 132.9 (16.8)  | 133.2 (16.4)  | 135.2 (17.6)  | 0.004             |
| DBP                            | 81.6 (9.2)                                  | 82.8 (9.5)    | 83.2 (9.4)    | 84.5 (9.7)    | 0.01              |
| Pulse pressure                 | 47.8 (9.4)                                  | 50.1 (11.0)   | 49.9 (11.3)   | 50.7 (11.9)   | 0.05              |
| Lipid at exam 1, mg/dL         |                                             |               |               |               |                   |
| Triglycerides                  | 311.3 (298.8)                               | 306.2 (225.4) | 274.3 (168.9) | 289.8 (346.8) | 0.16 <sup>§</sup> |
| Cholesterol                    | 234.9 (44.8)                                | 235.5 (43.2)  | 232.4 (45.5)  | 242.2 (44.2)  | 0.22              |

\*: Mean (SD) unless otherwise indicated; <sup>†</sup>: p for linear trend, adjusted for age at exam 3; <sup>‡</sup>: log-transformed; <sup>§</sup>: triglycerides are log-transformed for computation of linear trend. SBP = systolic blood pressure, DBP = diastolic blood pressure. event includes death, dementia or end of follow-up.

**Table S4. Subject characteristics by dementia sub-type: HAAS A $\beta$  sub-study**

| Characteristics*               | No dementia   | All AD        | p <sup>†</sup>    | Pure AD       | p <sup>†</sup>    | VaD           | p <sup>†</sup>    |
|--------------------------------|---------------|---------------|-------------------|---------------|-------------------|---------------|-------------------|
|                                | (n=590)       | (n=53)        |                   | (n=38)        |                   | (n=24)        |                   |
| Age at exam 3, years           | 58.5 (4.2)    | 62.2 (4.8)    | <0.001            | 61.8 (4.8)    | <0.001            | 61.3 (4.5)    | 0.002             |
| Age at event, years            | 83.0 (4.4)    | 83.2 (4.9)    | <0.001            | 83.0 (5.3)    | <0.001            | 80.7 (3.6)    | <0.001            |
| A $\beta$ draw to event, years | 16.2 (2.7)    | 12.6 (3.5)    | <0.001            | 12.9 (3.6)    | <0.001            | 11.0 (3.0)    | <0.001            |
| Education, years               | 10.8 (3.2)    | 9.5 (3.1)     | 0.08              | 9.6 (2.9)     | 0.12              | 10.0 (2.8)    | 0.48              |
| Stroke, n (%)                  | 36 (6.1)      | 0 (0.0)       | 0.06              | 0 (0.0)       | 0.12              | 9 (37.5)      | <0.001            |
| Diabetes, n (%)                | 239 (40.5)    | 21 (39.6)     | 0.84              | 15 (39.5)     | 0.83              | 13 (54.2)     | 0.19              |
| ApoE genotype, n (%)           |               |               |                   |               |                   |               |                   |
| 22 or 23                       | 49 (8.3)      | 2 (3.8)       |                   | 2 (5.3)       |                   | 2 (8.3)       |                   |
| 33                             | 412 (69.8)    | 26 (49.1)     |                   | 20 (52.6)     |                   | 17 (70.8)     |                   |
| 34 or 44                       | 99 (16.8)     | 21 (39.6)     | 0.002             | 13 (34.2)     | 0.05              | 5 (20.8)      | 0.99              |
| Missing value                  | 30 (5.1)      | 4 (7.6)       |                   | 3 (7.9)       |                   | 0 (0)         |                   |
| $\beta$ Amyloid <sup>‡</sup>   |               |               |                   |               |                   |               |                   |
| A $\beta$ 1-40                 | 5.16 (0.23)   | 5.13 (0.16)   | 0.11              | 5.10 (0.16)   | 0.04              | 5.21 (0.16)   | 0.52              |
| A $\beta$ 1-42                 | 3.14 (0.50)   | 3.05 (0.37)   | 0.14              | 3.00 (0.36)   | 0.08              | 3.22 (0.52)   | 0.48              |
| A $\beta$ 1-40/1-42 ratio      | 1.68 (0.25)   | 1.71 (0.27)   | 0.24              | 1.73 (0.29)   | 0.16              | 1.65 (0.24)   | 0.65              |
| Blood pressure, mmHg           |               |               |                   |               |                   |               |                   |
| SBP                            | 132.7 (16.6)  | 128.5 (14.1)  | 0.004             | 125.9 (12.5)  | 0.001             | 140.7 (21.0)  | 0.08              |
| DBP                            | 83.1 (9.5)    | 80.4 (7.7)    | 0.03              | 79.5 (8.0)    | 0.02              | 86.7 (11.7)   | 0.07              |
| Pulse pressure                 | 49.6 (10.9)   | 48.0 (9.3)    | 0.01              | 46.4 (8.0)    | 0.003             | 53.8 (14.9)   | 0.29              |
| Lipid at exam 1, mg/dL         |               |               |                   |               |                   |               |                   |
| Triglycerides                  | 292.6 (271.1) | 310.7 (190.0) | 0.12 <sup>§</sup> | 337.2 (208.7) | 0.05 <sup>§</sup> | 329.1 (362.6) | 0.89 <sup>§</sup> |
| Cholesterol                    | 235.6 (44.6)  | 248.6 (42.7)  | 0.04              | 250.2 (39.9)  | 0.05              | 225.4 (41.2)  | 0.28              |

\*: Mean (SD) unless otherwise indicated; <sup>†</sup>: adjusted for age at exam 3; <sup>‡</sup>: log-transformed; <sup>§</sup>: triglycerides are log-transformed for computation of the comparison. SBP = systolic blood pressure, DBP = diastolic blood pressure; event includes death, dementia or end of follow-up.

**Table S5. Median (25<sup>th</sup>; 75<sup>th</sup> percentiles) of average cortical neuropathology counts per plasma A $\beta$  tertile: HAAS A $\beta$  sub-study**

| Neuropathologic lesion                 | A $\beta$ tertile (from low to high) |                   |                   | P trend* |
|----------------------------------------|--------------------------------------|-------------------|-------------------|----------|
|                                        | T1                                   | T2                | T3                |          |
|                                        | Median (25%, 75%)                    | Median (25%, 75%) | Median (25%, 75%) |          |
| A $\beta$ 1-40, n                      | 18                                   | 27                | 28                |          |
| Neuritic plaques                       | 0.41 (0.33; 0.85)                    | 0.34 (0; 2.70)    | 0.47 (0.04; 1.36) | 0.46     |
| Neurofibrillary tangles                | 0.64 (0; 2.37)                       | 0.96 (0; 1.56)    | 0 (0; 2.0)        | 0.32     |
| A $\beta$ 1-42, n                      | 24                                   | 31                | 18                |          |
| Neuritic plaques                       | 0.44 (0; 2.68)                       | 0.57 (0; 3.1)     | 0.23 (0.03; 0.66) | 0.15     |
| Neurofibrillary tangles                | 1.08 (0; 2.90)                       | 0.05 (0; 2.0)     | 0 (0; 0.70)       | 0.52     |
| A $\beta$ 1-40/A $\beta$ 1-42 ratio, n | 20                                   | 25                | 28                |          |
| Neuritic plaques                       | 0 (0; 0.21)                          | 0.26 (0; 2.24)    | 1.07 (0; 2.9)     | 0.41     |
| Neurofibrillary tangles                | 0.07 (0; 0.68)                       | 1.05 (0; 7.5)     | 0.41 (0; 2.68)    | 0.10     |

\*: Adjusted for age at exam 3 and time from blood draw to censoring event (death, dementia or end of follow-up).
